# Supplementary material for: Cation-Selective Actuator–Sensor Response of Microcrystalline Cellulose Multi-Walled Carbon Nanotubes of Different Electrolytes Using Propylene Carbonate Solvent
Source: MDPI journal article supplement (doi:10.3390/polym16030339), 2024-01-26
Supplement: s1 [file s1]

## Supplementary

Article

# Cation-Selective Actuator–Sensor Response of Microcrystalline Cellulose Multi-Walled Carbon Nanotubes of Different Electrolytes Using Propylene Carbonate Solvent

Fred Elhi <sup>1</sup>, Quoc Bao Le <sup>2</sup> and Rudolf Kiefer <sup>2,\*</sup>

<sup>1</sup> Intelligent Materials and Systems Lab, Institute of Technology, University of Tartu, Nooruse 1, 50411 Tartu, Estonia; elhi.fred@gmail.com

<sup>2</sup> Conducting Polymers in Composites and Applications Research Group, Faculty of Applied Sciences, Ton Duc Thang University, Ho Chi Minh City 700000, Vietnam; lequocbao@tdtu.edu.vn

\* Correspondence: rudolf.kiefer@tdtu.edu.vn; Tel.: +84-35-6301264

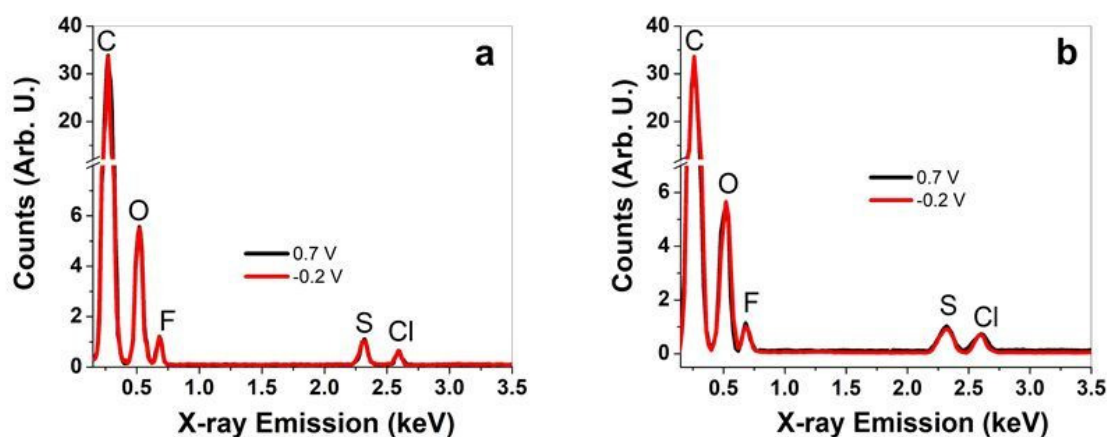

Figure S1. EDX spectroscopy of MC-MCNT fiber at potential 0.7 V (black line) and -0.2 V (red line) presenting the electrolyte LiTF in a) and TBATF in b) with PC solvent.

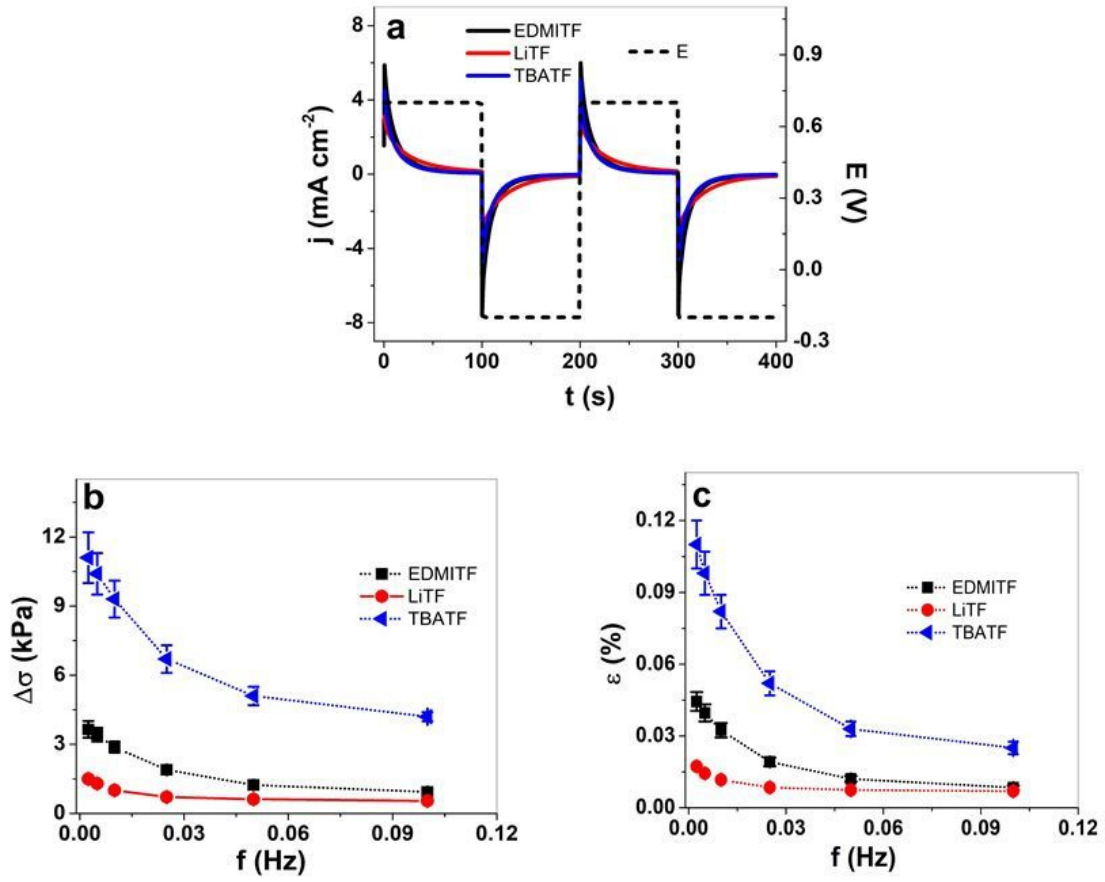

Figure S2. Square wave potential steps of MC-MCNT fiber in three different electrolytes using PC solvent such as EDMITF (black line, ■), LiTF (red line, ●) and TBATF (blue line, ▲) showing at 5 mHz frequency two subsequent cycles (3<sup>rd</sup> - 4<sup>th</sup>) of current density  $j$  against time  $t$  with potential  $E$  (0.7 V to -0.2 V) in a). The stress difference  $\Delta\sigma$  is shown in b) and the strain  $\varepsilon$  in c) against the applied frequencies  $f$  (0.0025 Hz to 0.1 Hz).

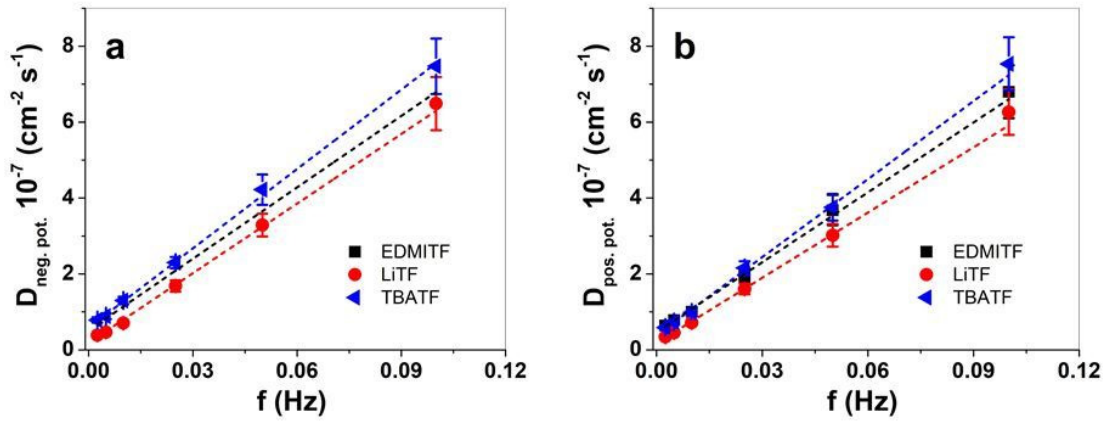

Figure S3. Diffusion coefficient at negative potential  $D_{\text{neg. pot.}}$  against applied frequencies  $f$  (0.0025 Hz to 0.1 Hz) of MC-MCNT fiber in three different electrolytes such as EDMITF (■), LiTF (●) and TBATF (◄) are shown in a) and the diffusion coefficient at positive potential ( $D_{\text{pos. pot.}}$ ) is presented in b). The dashed lines represent the linear fit.

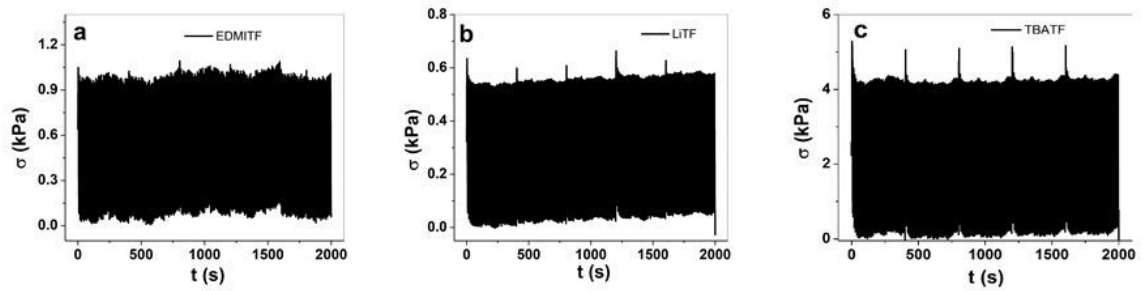

Figure S4. Stress time curves (200 cycles) at 0.1 Hz at a potential range of 0.7 V to -0.2 V of MC-MCNT fibers showing the electrolyte EDMITF in a), LiTF in b) and TBATF in c) using PC as the solvent.

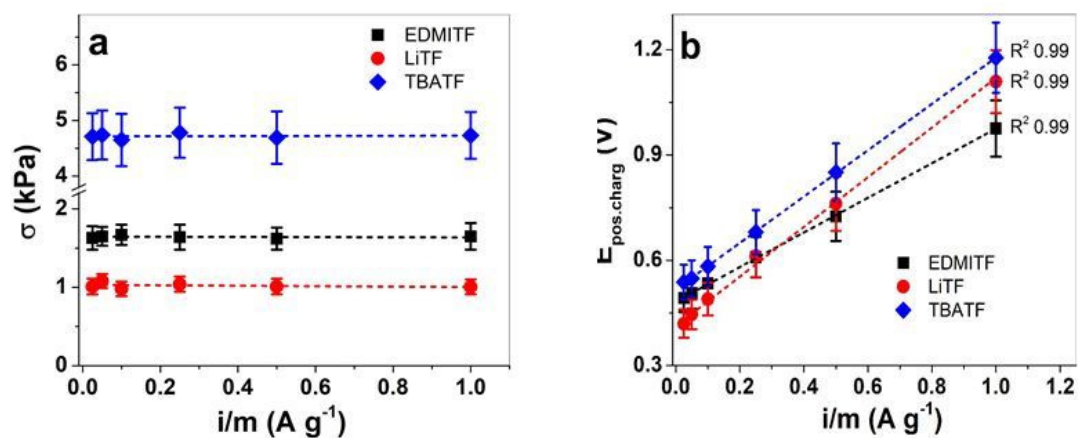

Figure S5. Chronopotentiometric measurements of MC-MCNT fiber in EDMITF (■), LiTF (●), and TBATF (◄) electrolyte in PC solvent showing stress  $\sigma$  in a) and positive charging potential  $E_{\text{pos,charg}}$  in b) against current density  $i/m$  ( $\pm 0.025$  A g<sup>-1</sup> -  $\pm 1$  A g<sup>-1</sup>). The dashed lines represent the linear fit with a correlation coefficient  $R^2$  at 0.99.
